# Supplementary material
Source: PubMed Central journal article supplement (PMC5059796)
Supplement: supp_tpc.16.00244_TPC2016-00244-RAR2_Supplemental_Data.pdf [file supp_tpc.16.00244_TPC2016-00244-RAR2_Supplemental_Data.pdf]

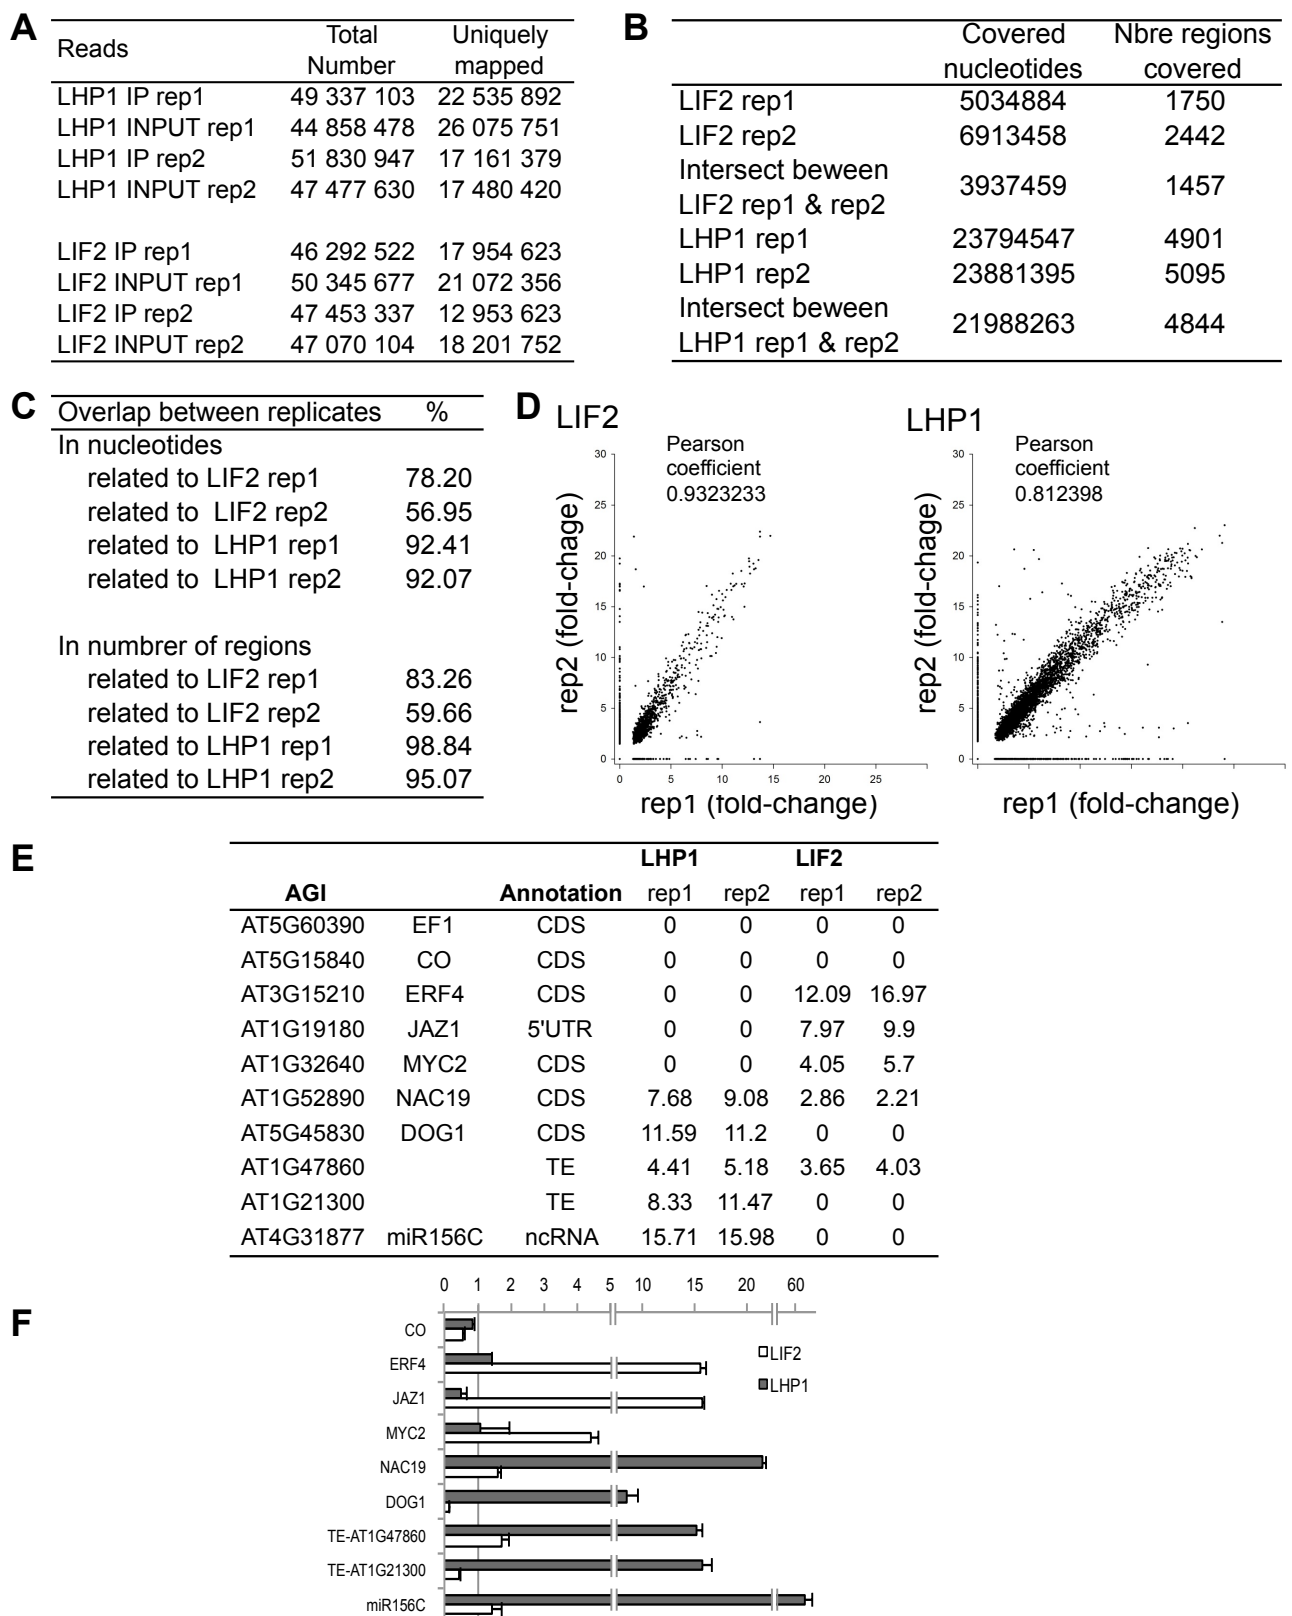

### Supplemental Figure 1: ChIP-seq experiments.

(A) Read counts and mapping in the two ChIP-seq biological replicates.

(B) Comparisons between replicates.

(C) Overlaps between replicates.

(D) MACS peak fold-change correlations between ChIP-seq replicates.

(E) Fold-changes in the two ChIP-seq biological replicates of selected target regions.

(F) Confirmation by ChIP-QPCR at targets identified by ChIP-seq. Protein enrichments were relative to input and the internal reference gene, *EF1α*. The values correspond to the mean of two biological replicates and three technical replicates for each  $\pm$ SE.

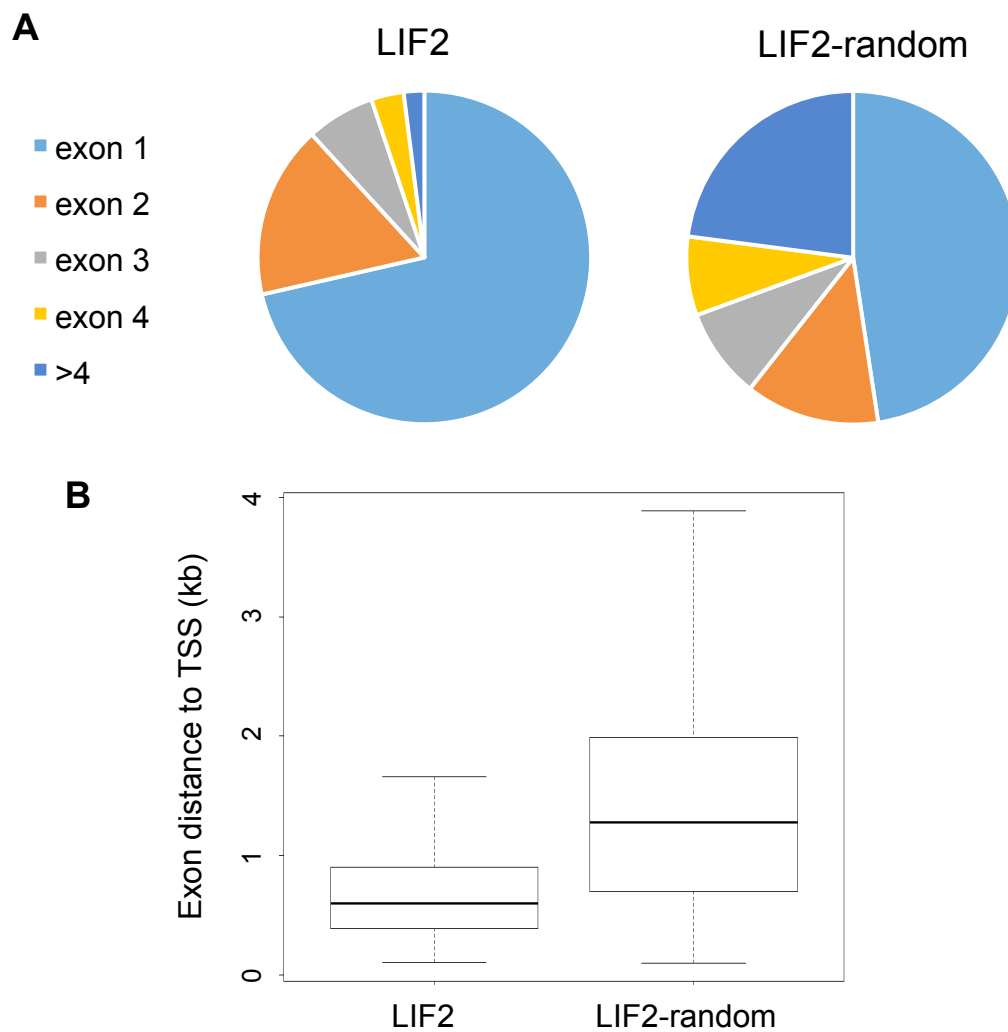

**Supplemental Figure 2: Exon distributions of LIF2 ERs.**

(A) Exon number distribution of LIF2 ERs and comparisons with the randomly shuffled control regions.

(B) Distance to TSS of the LIF2-bound exons and comparisons with the randomly shuffled control regions.

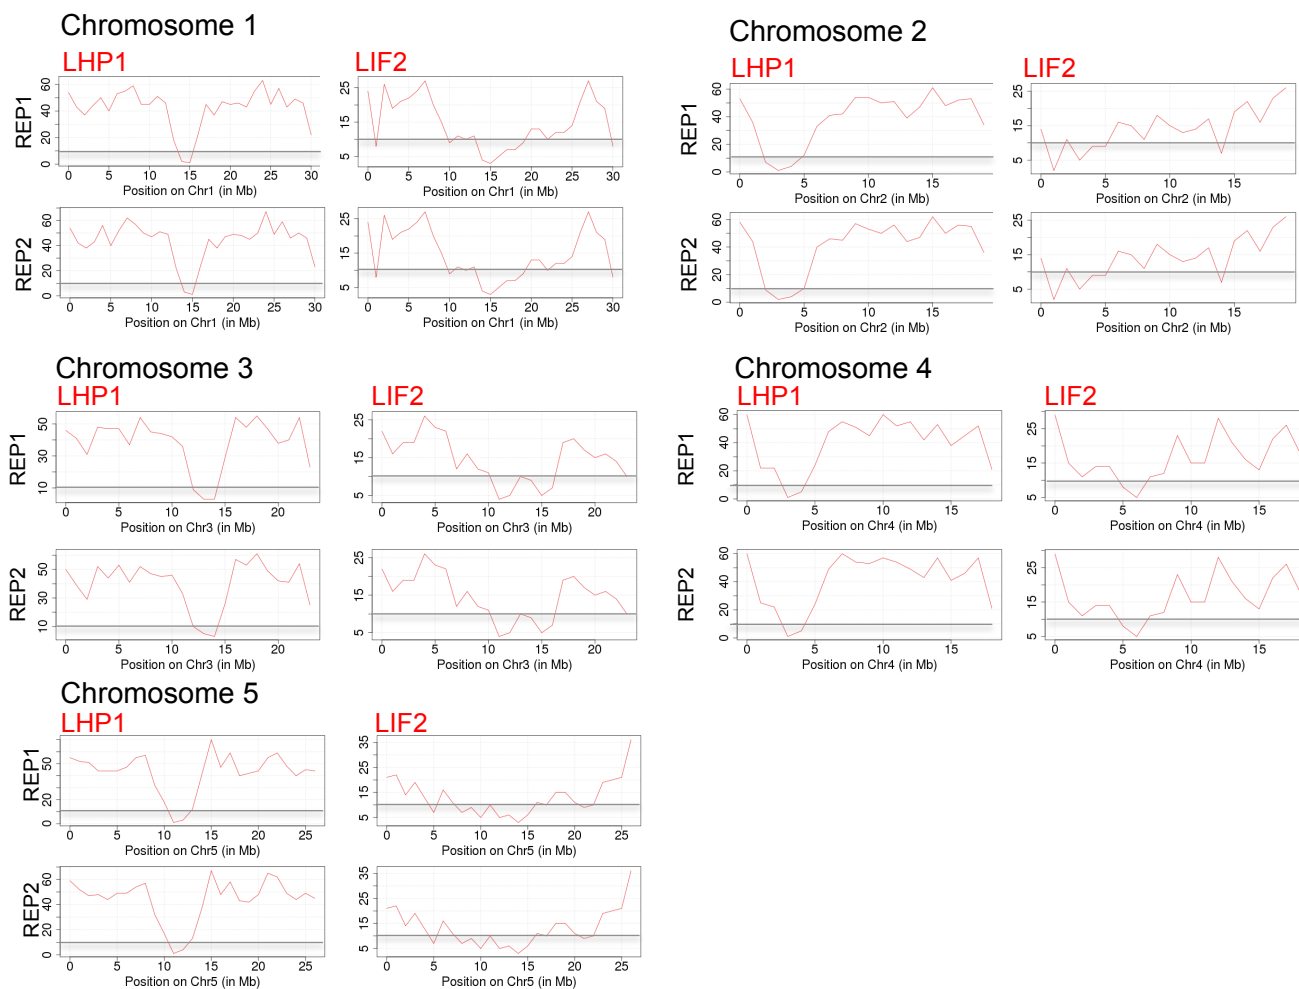

**Supplemental Figure 3:** Distributions of the sums of the summits in 1-Mb windows. For the two biological replicates, LHP1 and LIF2 distributions on the five chromosomes were compared by plotting the sums of their summits in 1-Mb windows.

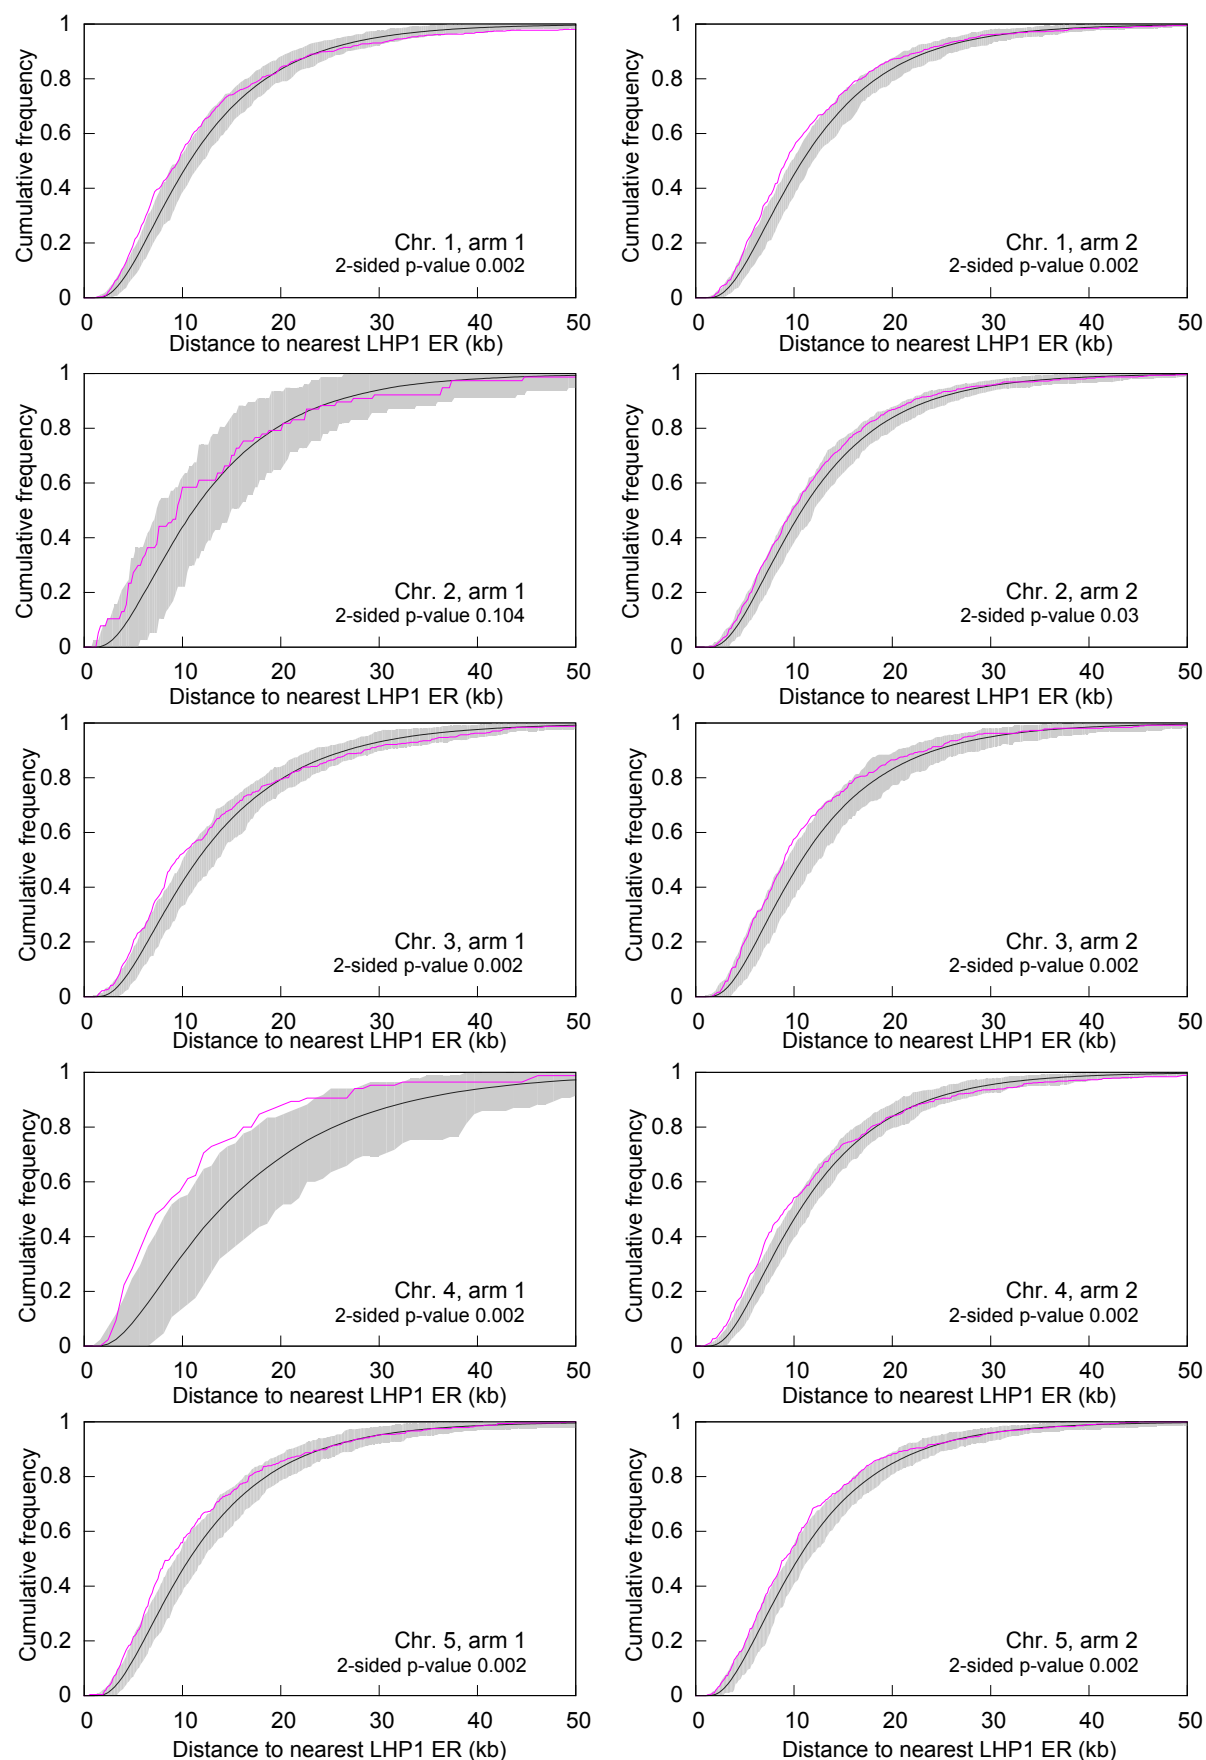

**Supplemental Figure 4:** Cumulative distribution of the distance to the nearest LHP1 summit. Pink: observed distribution; black: average distribution under the random model; grey: 95% envelope under the random model. Arm 1 of chromosome 2 and arm 1 of chromosome 4 bear the NOR and the knob, respectively, which introduce spatial constraints.

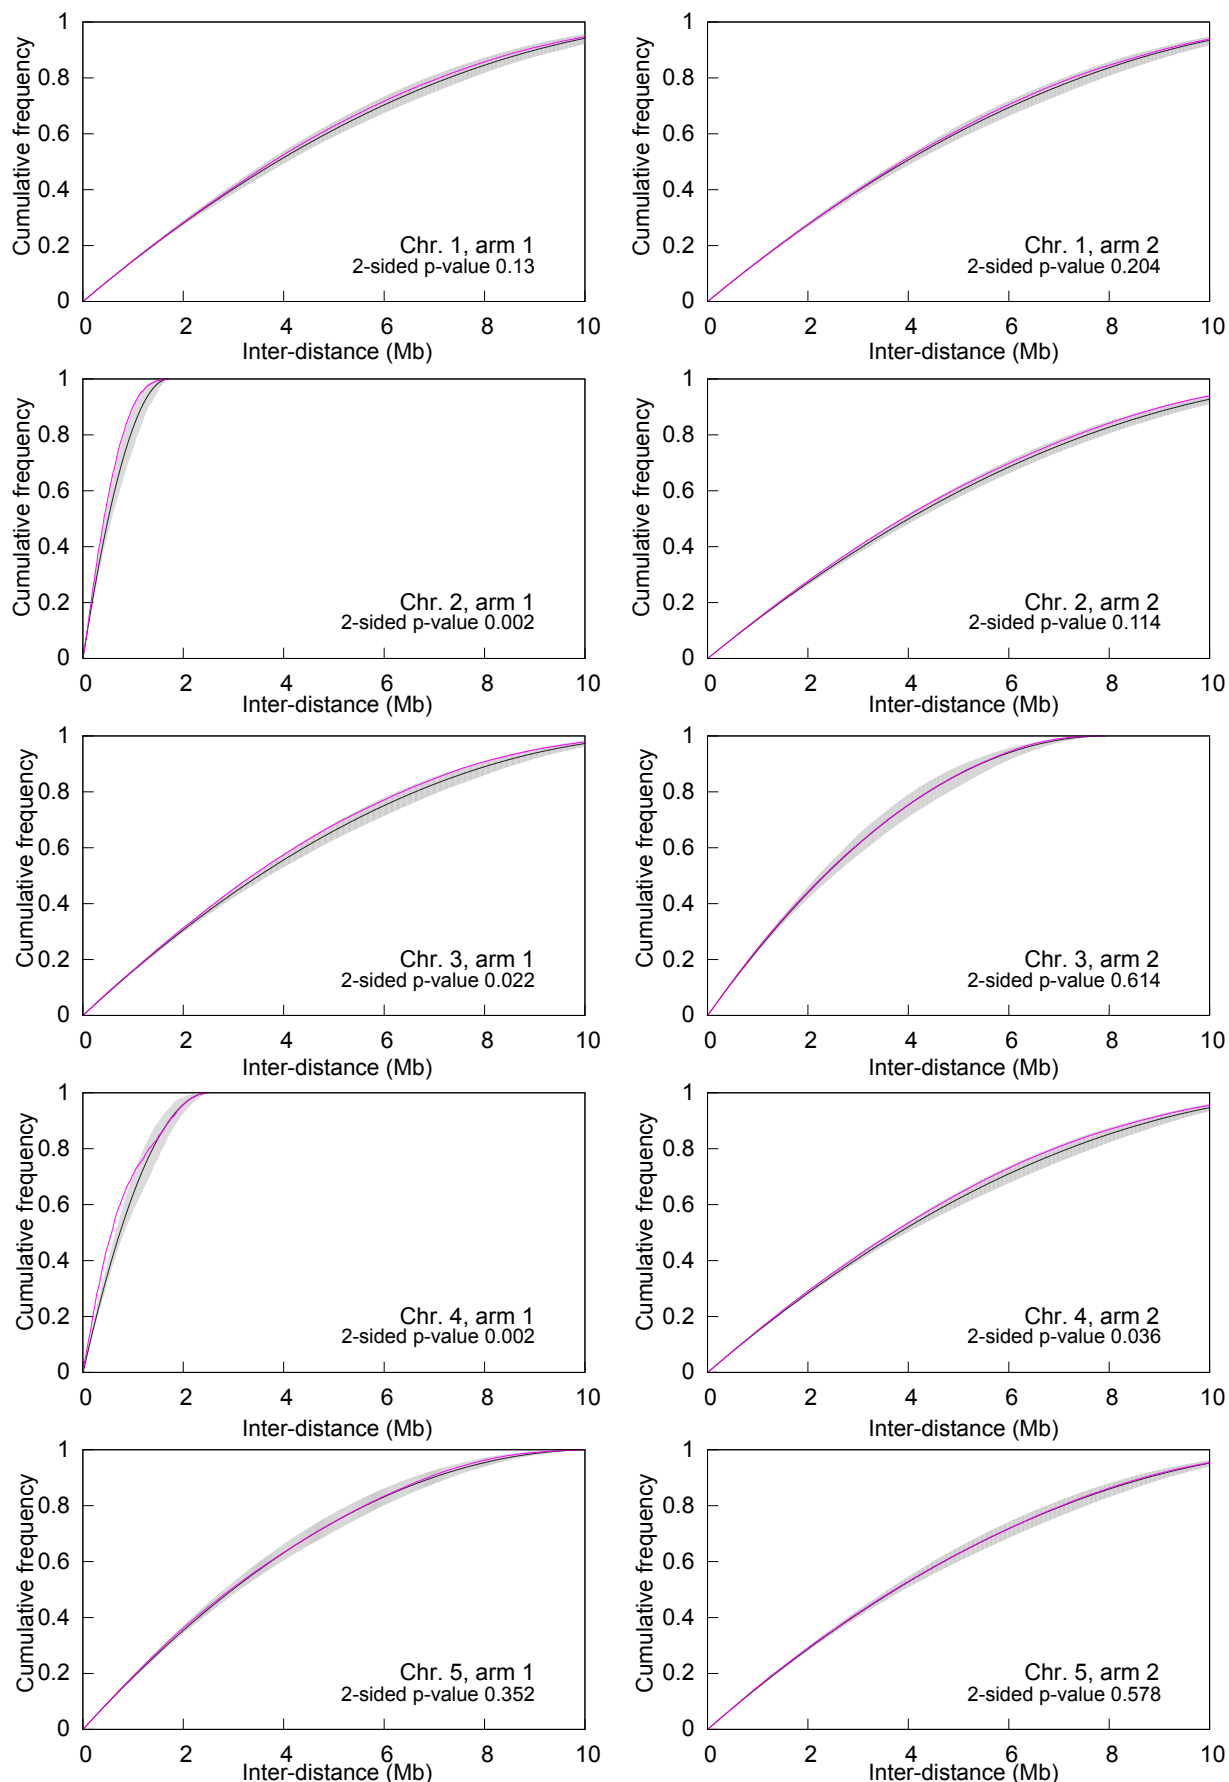

**Supplemental Figure 5:** Cumulative distribution of LHP1 summit inter-distances.

Pink: observed distribution; black: average distribution under the random model; grey: 95% envelope under the random model. Arm 1 of chromosome 2 and arm 1 of chromosome 4 bear the NOR and the knob, respectively, which introduce spatial constraints.

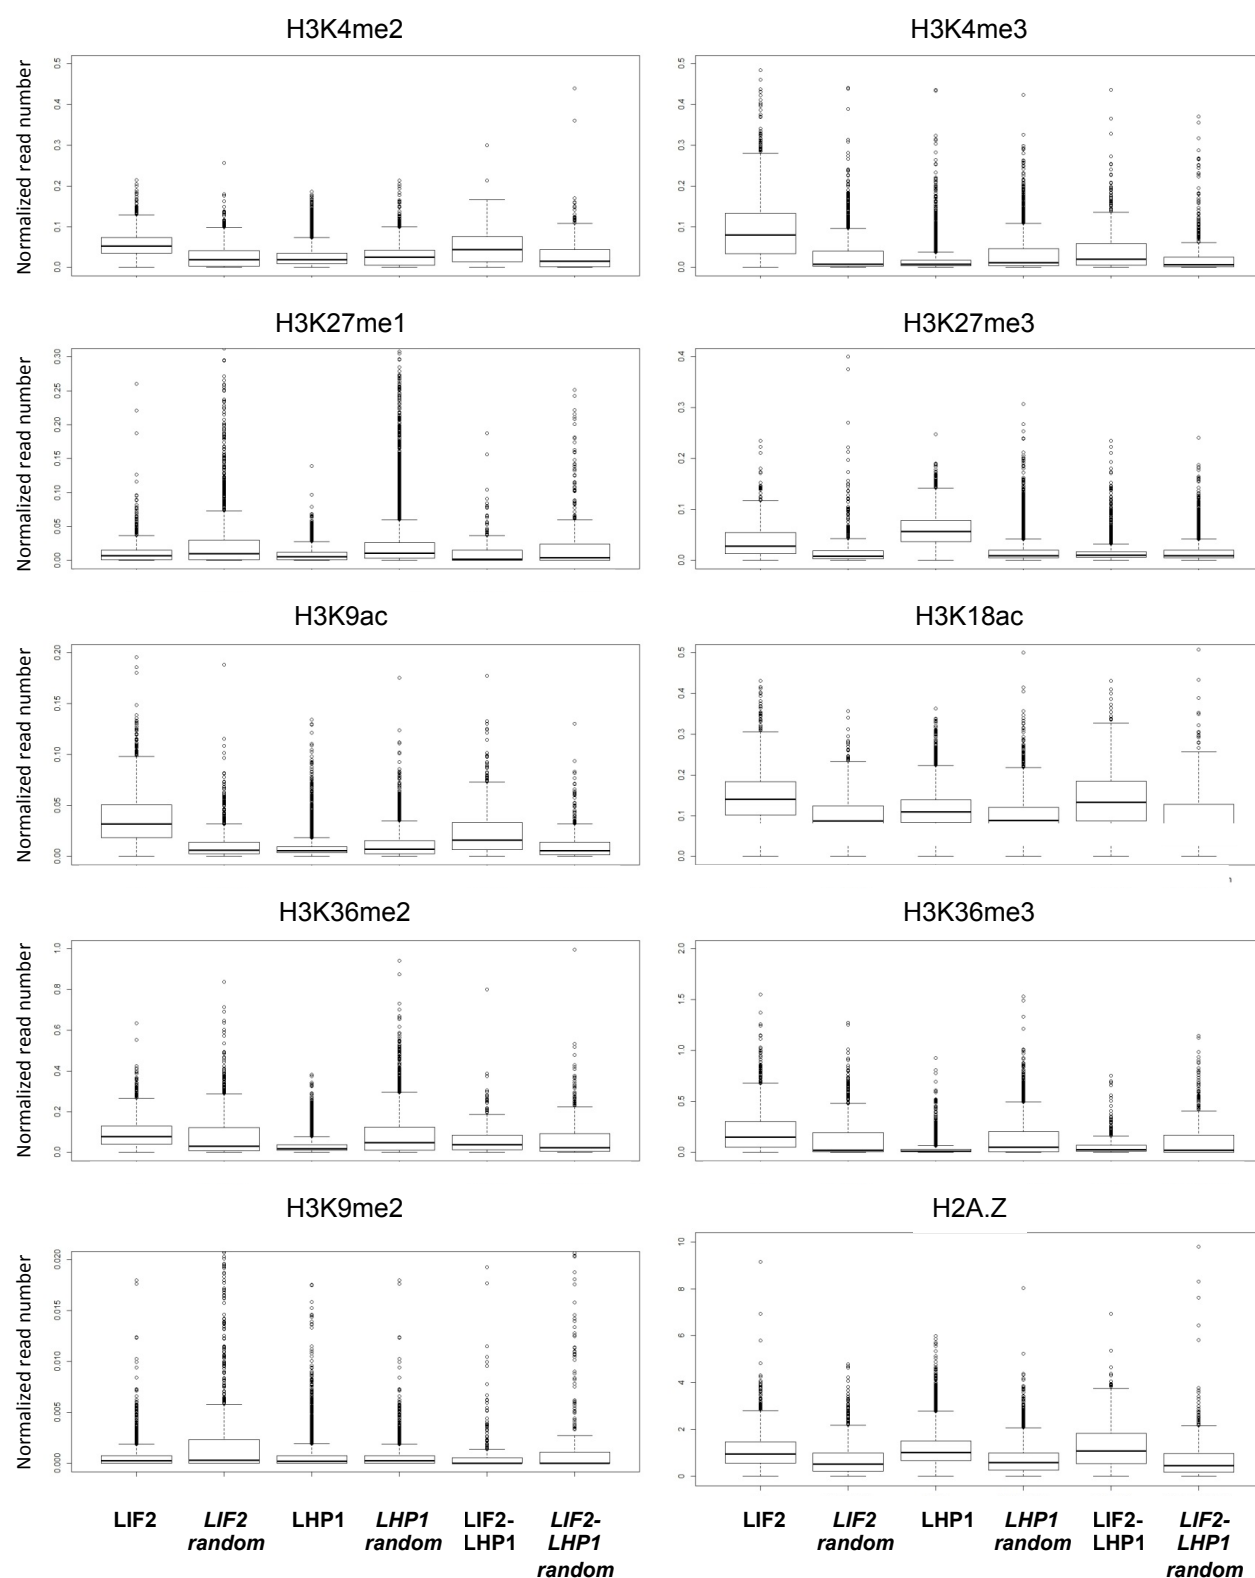

**Supplemental Figure 6:** Post-translational histone modifications and their distributions in LIF2 ERs, LHP1 ERs and LIF2-LHP1 IRs.

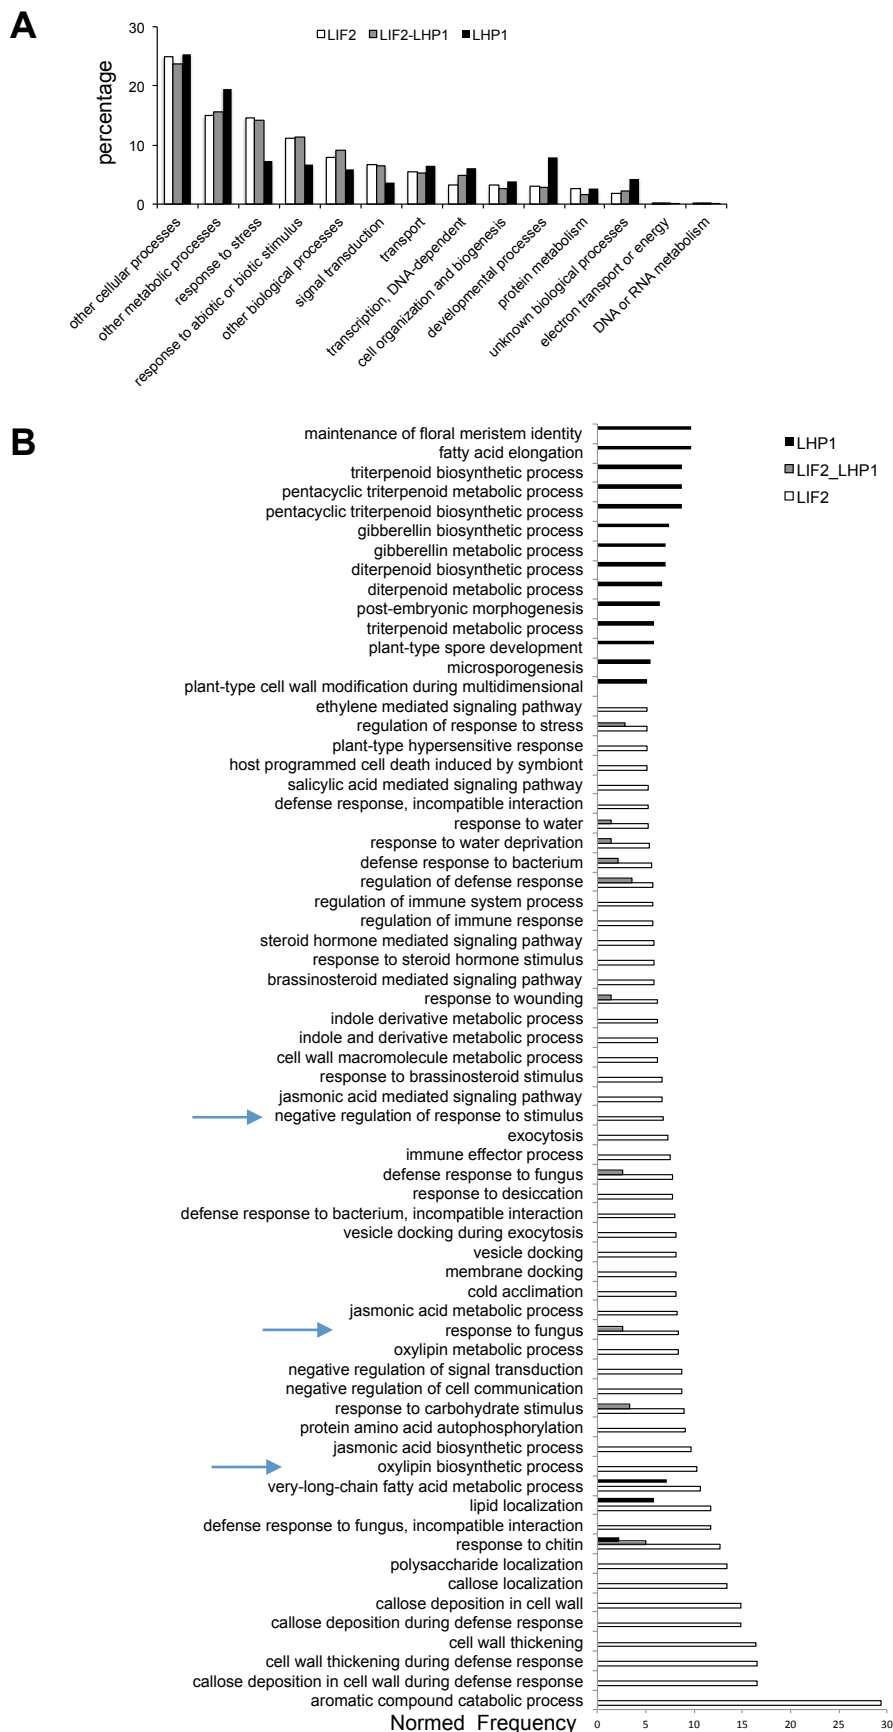

**Supplemental Figure 7: GO term analysis of the target loci of LIF2 and LHP1.**

(A) Functional categorization of the LIF2 ERs, LHP1 ERs and LIF2-LHP1 IRs (TAIR GO toolkit).

(B) Normed frequencies (NF) of the GO terms in the biological process categories with an over 4-fold enriched NF in at least one of the input lists (*i.e.*, LIF2 target genes, LHP1 target genes, genes of LIF2-LHP1 IRs) were compiled using AgriGO toolkit. Arrows: GO terms related to JA.

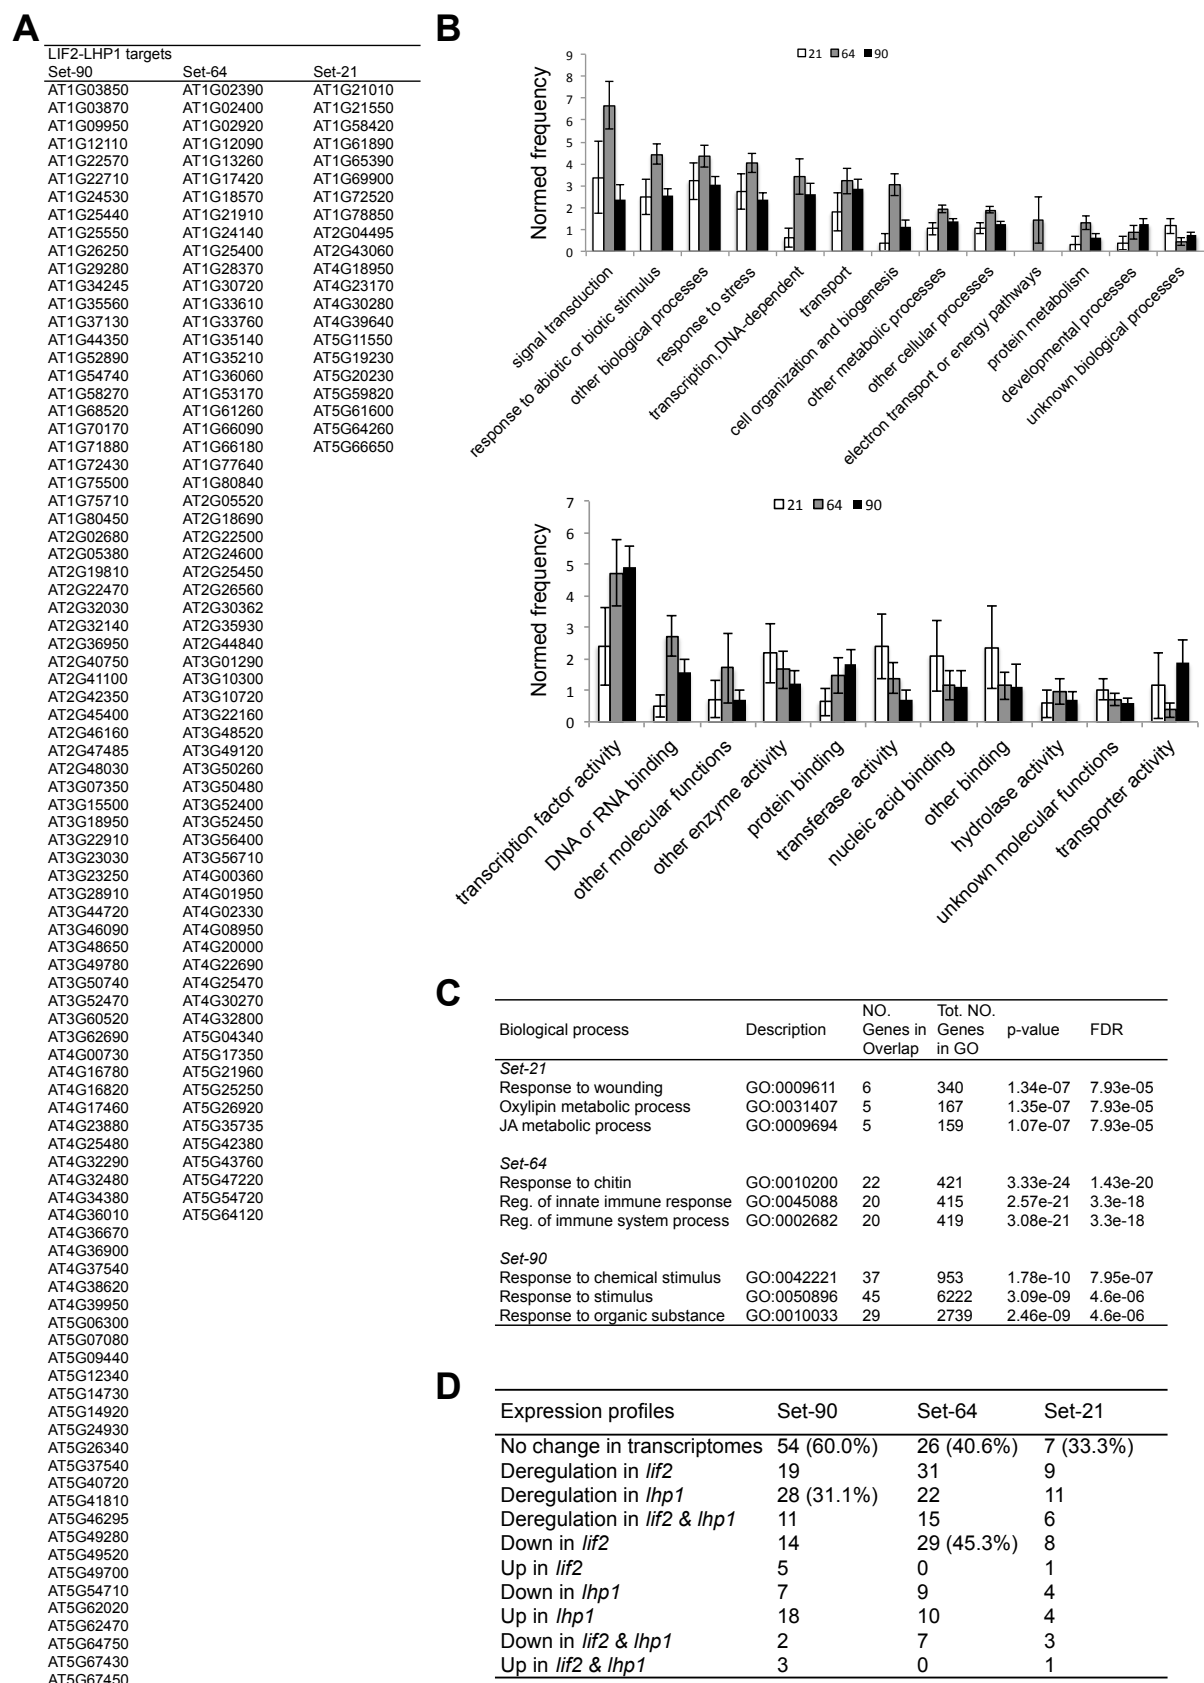

**Supplemental Figure 8:** Analyses of the LIF2-LHP1 IRs with binding alterations in the mutant backgrounds.

(A) Lists of the three sets of genes.

(B-C) GO analyses using BAR and Plant GSEA toolkits, respectively.

(D) Expression profiles of the gene sets. Percentages related to the number of genes in the Set were calculated for the largest classes.



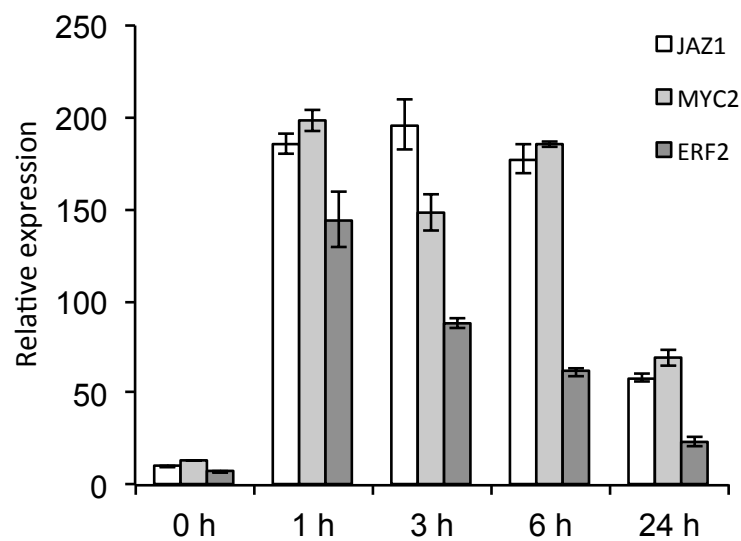

**Supplemental Figure 9:** Expression kinetics of JA-induced marker genes in response to MeJA treatment in wild-type plants.

Two-week-old seedlings were treated with JA for 1 to 24 hours and *JAZ1*, *MYC2* and *ERF2* expression was recorded. *EF1* was used as reference gene.

| <b>Tandem duplications (T-Clusters)</b>                                    | <b>Chromosome 4</b> | <b>Whole genome</b> |
|----------------------------------------------------------------------------|---------------------|---------------------|
| T-Clusters                                                                 | 248                 | 1564                |
| T-Cluster genes                                                            | 681                 | 4176                |
| Average T-Cluster size (gene number)                                       | 2.75                | 2.67                |
| T-Clusters & LHP1 targets genes                                            | 132                 | 861                 |
| % of T-Cluster genes targeted by LHP1                                      | 19.4                | 20.6                |
| % of LHP1 target genes in T-Clusters                                       | 23.8                | 23.1                |
| LHP1 target genes in T-Clusters (with no unannotated genes in the cluster) | n.d.                | 848                 |
| Clusters with 1 LHP1 target gene per cluster                               | n.d.                | 484                 |
| Clusters with 2 LHP1 target gene per cluster                               | n.d.                | 138                 |
| Clusters with 3 LHP1 target gene per cluster                               | n.d.                | 20                  |
| Clusters with 4 LHP1 target gene per cluster                               | n.d.                | 7                   |
| % of LHP1 targeted genes in T-clusters that have multiple LHP1 targets     | n.d.                | 9.6%                |

**Supplemental Table 1** : Tandem duplications and LHP1 target genes.  
n.d. non determined.

|                                        | LIF2             |           | LIF2-LHP1        |           |
|----------------------------------------|------------------|-----------|------------------|-----------|
|                                        | Normed Frequency | p-value   | Normed Frequency | p-value   |
| <i>Biological process</i>              |                  |           |                  |           |
| signal transduction                    | 3.34             | 1.753e-50 | 2.82             | 2.213e-11 |
| other biological processes             | 3.22             | 1.652e-87 | 3.27             | 8.384e-29 |
| response to abiotic or biotic stimulus | 3                | 1.399e-78 | 2.7              | 2.662e-19 |
| response to stress                     | 2.98             | 2.398e-87 | 2.67             | 5.353e-21 |
| transport                              | 2.32             | 2.349e-36 | 2.22             | 5.928e-11 |
| transcription,DNA-dependent            | 1.71             | 8.047e-10 | 2.15             | 1.356e-07 |
| other cellular processes               | 1.35             | 1.633e-24 | 1.24             | 4.149e-05 |
| other metabolic processes              | 1.34             | 3.208e-20 | 1.32             | 6.090e-07 |
| cell organization and biogenesis       | 1.2              | 5.091e-03 | 0.97             | 0.079     |
| electron transport or energy pathways  | 1.19             | 0.060     | 0.33             | 0.043     |
| developmental processes                | 1.13             | 0.013     | 1.04             | 0.071     |
| protein metabolism                     | 1.05             | 0.026     | 0.63             | 1.059e-03 |
| unknown biological processes           | 0.58             | 1.403e-18 | 0.68             | 1.004e-04 |
| DNA or RNA metabolism                  | 0.27             | 6.744e-06 | 0.12             | 2.346e-03 |
| <i>Molecular function</i>              |                  |           |                  |           |
| transcription factor activity          | 2.39             | 3.730e-18 | 3.7              | 2.739e-17 |
| DNA or RNA binding                     | 1.16             | 0.011     | 1.39             | 6.066e-03 |
| receptor binding or activity           | 1.43             | 0.100     | 1.31             | 0.255     |
| protein binding                        | 1.9              | 1.958e-13 | 1.29             | 0.031     |
| other enzyme activity                  | 1.2              | 0.033     | 1.25             | 0.082     |
| other molecular functions              | 1.2              | 3.401e-03 | 1.25             | 0.022     |
| transporter activity                   | 1.12             | 0.050     | 1.16             | 0.097     |
| other binding                          | 1.17             | 6.249e-04 | 1.12             | 0.032     |
| transferase activity                   | 1.52             | 4.876e-07 | 1.05             | 0.078     |
| nucleic acid binding                   | 0.53             | 1.859e-04 | 0.72             | 0.068     |
| unknown molecular functions            | 0.66             | 3.823e-12 | 0.71             | 3.973e-04 |
| hydrolase activity                     | 1.01             | 0.045     | 0.7              | 0.022     |
| kinase activity                        | 1.83             | 5.319e-07 | 0.68             | 0.070     |
| nucleotide binding                     | 1.15             | 0.011     | 0.64             | 9.169e-03 |
| structural molecule activity           | 0.52             | 0.016     | 0.63             | 0.154     |

**Supplemental Table 2:** GO term analysis of the genes present in LIF2 ERs and LIF2-LHP1 IRs using the Plant Functional Genomics (BAR) classification Supervisor program.

| TF family                                | Nbr Genes | Total in family | p-value  | FDR      |
|------------------------------------------|-----------|-----------------|----------|----------|
| <b>LIF2</b>                              |           |                 |          |          |
| AP2-EREBP                                | 24        | 138             | 1.57e-11 | 1.79e-08 |
| WRKY                                     | 12        | 72              | 2.82e-06 | 1.07e-03 |
| <b>LIF2_LHP1</b>                         |           |                 |          |          |
| AP2-EREBP                                | 17        | 138             | 2.72e-14 | 1.11e-11 |
| C2C2-CO-Like                             | 4         | 30              | 1.97e-04 | 0.0202   |
| C2H2                                     | 8         | 211             | 6.24e-04 | 0.0488   |
| WRKY                                     | 6         | 72              | 5.63e-05 | 7.68e-03 |
| <b>LHP1</b>                              |           |                 |          |          |
| C2H2                                     | 34        | 211             | 1.00E-04 | 0.0146   |
| BASIC HELIX-LOOP-HELIX (bHLH)            | 33        | 162             | 1.94e-06 | 5.27e-04 |
| BHLH                                     | 33        | 161             | 1.73e-06 | 5.27e-04 |
| MADS                                     | 31        | 109             | 7.36e-09 | 4.66e-06 |
| MADS-BOX                                 | 31        | 108             | 6.13e-09 | 4.66e-06 |
| HOMEODOMAIN                              | 29        | 91              | 2.66e-09 | 4.66e-06 |
| MYB                                      | 27        | 131             | 1.34e-05 | 2.82e-03 |
| MYB3R- and R2R3- TYPE MYB-encoding genes | 27        | 132             | 1.5e-05  | 2.86e-03 |
| NAC                                      | 19        | 96              | 3.76e-04 | 0.0434   |
| WRKY                                     | 18        | 72              | 4.29e-05 | 6.79e-03 |
| ZINC FINGER-HOMEODOMAIN - ZHD subfamily  | 7         | 14              | 3.88e-04 | 0.0434   |

**Supplemental Table 3:** Enrichments of LIF2 and LHP1 targets in specific transcription factor families using the PlantGSEA resource.

| TF               | Genes targeted | Total genomic targets | p-value  | FDR      | Genes targeted by TF in ERs                                                                                                                                                                                                                                                                                                                                                                                                                                                                                                                                                                                                       |
|------------------|----------------|-----------------------|----------|----------|-----------------------------------------------------------------------------------------------------------------------------------------------------------------------------------------------------------------------------------------------------------------------------------------------------------------------------------------------------------------------------------------------------------------------------------------------------------------------------------------------------------------------------------------------------------------------------------------------------------------------------------|
| <b>LIF2</b>      |                |                       |          |          |                                                                                                                                                                                                                                                                                                                                                                                                                                                                                                                                                                                                                                   |
| AGL15 (MADS box) | 7              | 22                    | 9.89e-06 | 1.69e-04 | AT1G02400 AT1G14920 AT4G25470 AT2G45830 AT4G38680 AT1G68840 AT1G13260                                                                                                                                                                                                                                                                                                                                                                                                                                                                                                                                                             |
| AP2 (AP2/EREBP)  | 18             | 165                   | 2.87e-06 | 5.73e-05 | AT1G11050 AT1G13260 AT1G22530 AT1G23390 AT1G71030 AT3G55980 AT4G00730 AT4G01250 AT4G02540 AT4G08950 AT4G16490 AT4G20260 AT4G25480 AT4G26690 AT4G29190 AT5G19140 AT5G20250 AT5G49360                                                                                                                                                                                                                                                                                                                                                                                                                                               |
| PIF1 (AtbHLH15)  | 22             | 189                   | 8.38e-08 | 2.51e-06 | AT1G25550 AT1G28330 AT1G52890 AT1G56220 AT1G60190 AT1G68670 AT2G01570 AT2G16660 AT2G27500 AT2G45820 AT2G46710 AT3G02550 AT3G04730 AT3G12920 AT3G24050 AT3G24503 AT3G25870 AT4G17460 AT5G24930 AT5G54380 AT5G64260 AT5G65430                                                                                                                                                                                                                                                                                                                                                                                                       |
| HY5 (bZIP)       | 61             | 221                   | 6.37e-37 | 7.64e-35 | AT1G07135 AT1G09070 AT1G17420 AT1G18300 AT1G18570 AT1G20510 AT1G21910 AT1G24140 AT1G24530 AT1G53170 AT1G56660 AT1G60190 AT1G61340 AT1G61890 AT1G66160 AT1G68840 AT1G69760 AT1G73500 AT1G77640 AT1G78850 AT2G22500 AT2G25460 AT2G27660 AT2G30040 AT2G33580 AT2G35290 AT2G35930 AT2G39650 AT2G41100 AT2G41640 AT3G06080 AT3G14440 AT3G25250 AT3G46080 AT3G48520 AT3G52400 AT3G54810 AT3G55980 AT3G56880 AT3G62260 AT3G62720 AT4G08950 AT4G17500 AT4G25490 AT4G27310 AT4G29780 AT4G32800 AT4G33920 AT4G34150 AT4G36670 AT5G01100 AT5G43890 AT5G45110 AT5G45340 AT5G49280 AT5G49520 AT5G52020 AT5G59550 AT5G62020 AT5G62520 AT5G66650 |
| <b>LIF2_LHP1</b> |                |                       |          |          |                                                                                                                                                                                                                                                                                                                                                                                                                                                                                                                                                                                                                                   |
| AGL15 (MADS box) | 4              | 22                    | 6.71e-05 | 7.64e-04 | AT1G02400 AT1G13260 AT2G45830 AT4G25470                                                                                                                                                                                                                                                                                                                                                                                                                                                                                                                                                                                           |
| AP2 (AP2/EREBP)  | 6              | 165                   | 3.61e-03 | 0.0274   | AT4G00730 AT4G37540 AT4G25480 AT4G08950 AT5G54470 AT1G13260                                                                                                                                                                                                                                                                                                                                                                                                                                                                                                                                                                       |
| PIF1 (AtbHLH15)  | 6              | 189                   | 6.79e-03 | 0.0441   | AT1G03850 AT1G25550 AT1G52890 AT4G17460 AT5G24930 AT5G64260                                                                                                                                                                                                                                                                                                                                                                                                                                                                                                                                                                       |
| HY5 (bZIP)       | 30             | 221                   | 1.75e-25 | 7.97e-24 | AT1G17420 AT1G18570 AT1G21910 AT1G24140 AT1G24530 AT1G25400 AT1G53170 AT1G61890 AT1G77640 AT1G78850 AT2G22500 AT2G27660 AT2G35290 AT2G35930 AT2G37430 AT2G41100 AT3G25250 AT3G46080 AT3G48520 AT3G52400 AT4G08950 AT4G32800 AT4G36670 AT5G43890 AT5G49280 AT5G49520 AT5G52020 AT5G59820 AT5G62020 AT5G66650                                                                                                                                                                                                                                                                                                                       |
| <b>LHP1</b>      |                |                       |          |          |                                                                                                                                                                                                                                                                                                                                                                                                                                                                                                                                                                                                                                   |
| AP2 (AP2/EREBP)  | 30             | 165                   | 3.73e-05 | 1.68e-03 | AT2G16760 AT2G14210 AT5G54470 AT1G71050 AT4G00730 AT4G04630 AT5G67180 AT5G07030 AT3G58780 AT4G36870 AT2G40435 AT5G15310 AT4G13210 AT2G18550 AT2G43620 AT2G45660 AT1G35910 AT1G70560 AT4G18960 AT5G64870 AT4G37540 AT5G13790 AT1G73590 AT5G67060 AT1G13260 AT1G35730 AT3G55710 AT2G42830 AT4G08950 AT4G24050                                                                                                                                                                                                                                                                                                                       |
| HY5 (bZIP)       | 42             | 221                   | 4.27e-07 | 5.86e-05 | AT1G24530 AT5G52020 AT5G25810 AT1G78990 AT1G17420 AT3G52400 AT2G47460 AT1G61890 AT5G23010 AT4G27250 AT1G02810 AT2G22500 AT5G49520 AT5G57510 AT1G16850 AT4G36670 AT3G55120 AT2G37430 AT1G53170 AT5G59820 AT5G66650 AT1G32450 AT5G44120 AT5G42800 AT2G28630 AT3G48520 AT5G62490 AT5G24140 AT5G59780 AT2G15020 AT3G21720 AT5G49280 AT1G17380 AT5G10100 AT4G08950 AT4G05100 AT2G41100 AT3G22830 AT5G62020 AT1G78850 AT1G12950 AT5G13930 AT3G54340 AT2G22540 AT3G58780 AT3G02310 AT2G45660 AT4G18960 AT5G13790 AT2G03710 AT4G24540 AT2G42830 AT5G15800                                                                                 |

**Supplemental Table 4:** LIF2 and LHP1 targets are also bound by specific transcription factors.

The PlantGSEA and AGRIS toolkits were used.

| Segment Name          | Unique sequence occurrences | Total occurrence | Expected unique sequence | Expected occurrences | Rank  | Score   |
|-----------------------|-----------------------------|------------------|--------------------------|----------------------|-------|---------|
| <i>ACGTGGCA word</i>  |                             |                  |                          |                      |       |         |
| Distal Promoter       | 598                         | 621              | 497.582                  | 503.982              | 1175  | 109.93  |
| Proximal Promoter     | 414                         | 431              | 353.216                  | 358.329              | 1251  | 65.7371 |
| Core Promoter         | 172                         | 174              | 141.099                  | 152.113              | 539   | 34.061  |
| 5'UTR                 | 26                          | 26               | 15.5612                  | 16.4062              | 3156  | 13.3462 |
| Intron                | 48                          | 48               | 38.8425                  | 40.5848              | 21162 | 10.161  |
| 3'UTR                 | 26                          | 27               | 21.3065                  | 22                   | 14830 | 5.1762  |
| Genome-wide           | 5                           | 1265             | 5                        | 1020.69              | 2410  | 0       |
| <i>AAACCCCTA word</i> |                             |                  |                          |                      |       |         |
| Intron                | 764                         | 802              | 652.752                  | 686.061              | 672   | 120.231 |
| 5'UTR                 | 911                         | 952              | 825.505                  | 908.536              | 26    | 89.7771 |
| Distal Promoter       | 3116                        | 3674             | 3041.64                  | 3238.08              | 2631  | 75.2602 |
| Core Promoter         | 639                         | 658              | 568.781                  | 618.048              | 51    | 74.3858 |
| Proximal Promoter     | 1606                        | 1779             | 1540.73                  | 1598.78              | 1209  | 66.6328 |
| 3'UTR                 | 91                          | 92               | 75.7094                  | 78.332               | 2976  | 16.7401 |
| Genome-wide           | 5                           | 11340            | 5                        | 9887.71              | 55    | 0       |

**Supplemental Table 5:** Occurrences of the two identified DNA words. The word frequency calculation was performed in non-coding segments of the *A. thaliana* genome, using the Arabidopsis *cis*-regulatory element database (<http://arabidopsis.med.ohio-state.edu/AtcisDB/>).

| GO term                   | Description                                                           | Normed frequency | p-value | FDR     |
|---------------------------|-----------------------------------------------------------------------|------------------|---------|---------|
| <i>lhp1</i> LIF2 depleted |                                                                       |                  |         |         |
| <i>Biological process</i> |                                                                       |                  |         |         |
| GO:0052542                | callose deposition during defense response                            | 31,5             | 1.4e-06 | 2.4e-05 |
| GO:0033037                | polysaccharide localization                                           | 28,5             | 2.2e-06 | 3.3e-05 |
| GO:0052545                | callose localization                                                  | 28,5             | 2.2e-06 | 3.3e-05 |
| GO:0010200                | response to chitin                                                    | 24,5             | 2.1e-31 | 5.0e-29 |
| GO:0009631                | cold acclimation                                                      | 20,6             | 8.7e-06 | 0.00013 |
| GO:0002252                | immune effector process                                               | 19,3             | 1.2e-05 | 0.00016 |
| GO:0031408                | oxylipin biosynthetic process                                         | 18,7             | 1.3e-05 | 0.00018 |
| GO:0009867                | jasmonic acid mediated signaling pathway                              | 17,1             | 4.1e-07 | 7.6e-06 |
| GO:0009743                | response to carbohydrate stimulus                                     | 16,9             | 1.5e-29 | 2.4e-27 |
| GO:0031407                | oxylipin metabolic process                                            | 15,3             | 3.2e-05 | 0.00041 |
| GO:0002682                | regulation of immune system process                                   | 14,6             | 4.0e-05 | 0.00049 |
| GO:0050776                | regulation of immune response                                         | 14,6             | 4.0e-05 | 0.00049 |
| GO:0042434                | indole derivative metabolic process                                   | 13,5             | 9.7e-06 | 0.00014 |
| GO:0042430                | indole and derivative metabolic process                               | 13,5             | 9.7e-06 | 0.00014 |
| GO:0050832                | defense response to fungus                                            | 13,3             | 4.1e-10 | 1.4e-08 |
| GO:0009873                | ethylene mediated signaling pathway                                   | 12,9             | 4.3e-07 | 7.7e-06 |
| GO:0031347                | regulation of defense response                                        | 12,7             | 2.6e-06 | 3.9e-05 |
| GO:0080134                | regulation of response to stress                                      | 11,5             | 9.6e-07 | 1.7e-05 |
| GO:0009620                | response to fungus                                                    | 11,3             | 2.0e-11 | 1.1e-09 |
| GO:0000160                | two-component signal transduction system (phosphorelay)               | 10,4             | 2.0e-06 | 3.2e-05 |
| GO:0009611                | response to wounding                                                  | 10,3             | 3.8e-12 | 2.3e-10 |
| GO:0042742                | defense response to bacterium                                         | 10,1             | 9.0e-11 | 4.3e-09 |
| GO:0009415                | response to water                                                     | 10,0             | 8.4e-14 | 7.3e-12 |
| GO:0009414                | response to water deprivation                                         | 9,9              | 3.8e-13 | 3.0e-11 |
| GO:0019760                | glucosinolate metabolic process                                       | 9,6              | 0.00024 | 0.0026  |
| GO:0016143                | S-glycoside metabolic process                                         | 9,6              | 0.00024 | 0.0026  |
| GO:0019757                | glycosinolate metabolic process                                       | 9,6              | 0.00024 | 0.0026  |
| GO:0048585                | negative regulation of response to stimulus                           | 8,7              | 9.5e-05 | 0.0011  |
| GO:0006955                | immune response                                                       | 8,5              | 5.5e-16 | 6.2e-14 |
| GO:0002376                | immune system process                                                 | 8,4              | 5.9e-16 | 6.2e-14 |
| GO:0045087                | innate immune response                                                | 8,3              | 1.2e-14 | 1.2e-12 |
| GO:0009642                | response to light intensity                                           | 8,0              | 0.00015 | 0.0018  |
| GO:0009617                | response to bacterium                                                 | 7,7              | 8.6e-10 | 2.7e-08 |
| GO:0009723                | response to ethylene stimulus                                         | 7,2              | 2.4e-07 | 4.9e-06 |
| GO:0006952                | defense response                                                      | 7,2              | 9.6e-25 | 1.3e-22 |
| <i>Molecular function</i> |                                                                       |                  |         |         |
| GO:0016564                | transcription repressor activity                                      | 17,1             | 9.0e-09 | 8.9e-07 |
| <i>lif2</i> LHP1 depleted |                                                                       |                  |         |         |
| <i>Biological process</i> |                                                                       |                  |         |         |
| GO:0010876                | lipid localization                                                    | 16,7             | 5.6e-13 | 3.6e-11 |
| GO:0010076                | maintenance of floral meristem identity                               | 16,7             | 1.2e-05 | 0.00037 |
| GO:0046087                | cytidine metabolic process                                            | 16,7             | 1.2e-05 | 0.00037 |
| GO:0006216                | cytidine catabolic process                                            | 16,7             | 1.2e-05 | 0.00037 |
| GO:0009972                | cytidine deamination                                                  | 16,7             | 1.2e-05 | 0.00037 |
| GO:0046135                | pyrimidine nucleoside catabolic process                               | 15,0             | 1.8e-05 | 0.00053 |
| GO:0046133                | pyrimidine ribonucleoside catabolic process                           | 15,0             | 1.8e-05 | 0.00053 |
| GO:0010022                | meristem determinacy                                                  | 13,9             | 0.00013 | 0.0027  |
| GO:0009164                | nucleoside catabolic process                                          | 13,6             | 2.8e-05 | 0.00075 |
| GO:0042454                | ribonucleoside catabolic process                                      | 13,6             | 2.8e-05 | 0.00075 |
| GO:0034656                | nucleobase, nucleoside and nucleotide catabolic process               | 12,5             | 4.0e-05 | 0.001   |
| GO:0034655                | nucleobase, nucleoside, nucleotide and nucleic acid catabolic process | 12,5             | 4.0e-05 | 0.001   |
| GO:0045962                | positive regulation of development, heterochronic                     | 12,5             | 0.00018 | 0.0038  |
| GO:0046131                | pyrimidine ribonucleoside metabolic process                           | 10,7             | 7.8e-05 | 0.0019  |
| GO:0006213                | pyrimidine nucleoside metabolic process                               | 10,0             | 0.00011 | 0.0023  |
| GO:0009886                | post-embryonic morphogenesis                                          | 9,3              | 2.1e-08 | 9.7e-07 |
| GO:0045596                | negative regulation of cell differentiation                           | 8,1              | 8.1e-07 | 3.2e-05 |
| GO:0065001                | specification of axis polarity                                        | 7,9              | 9.1e-05 | 0.0021  |
| GO:0016145                | S-glycoside catabolic process                                         | 7,9              | 0.0003  | 0.006   |
| GO:0019759                | glycosinolate catabolic process                                       | 7,9              | 0.0003  | 0.006   |
| GO:0019762                | glucosinolate catabolic process                                       | 7,9              | 0.0003  | 0.006   |
| GO:0010089                | xylem development                                                     | 7,8              | 0.001   | 0.017   |
| GO:0016139                | glycoside catabolic process                                           | 7,5              | 0.00038 | 0.0073  |
| GO:0010074                | maintenance of meristem identity                                      | 7,4              | 4.4e-05 | 0.0011  |
| GO:0048440                | carpel development                                                    | 7,4              | 3.6e-11 | 2.0e-09 |
| GO:0009943                | adaxial/abaxial axis specification                                    | 7,3              | 0.00014 | 0.0031  |
| GO:0019827                | stem cell maintenance                                                 | 7,3              | 1.7e-05 | 0.0005  |
| GO:0048864                | stem cell development                                                 | 7,3              | 1.7e-05 | 0.0005  |
| GO:0009944                | polarity specification of adaxial/abaxial axis                        | 7,1              | 0.00048 | 0.0088  |
| GO:0006722                | triterpenoid metabolic process                                        | 7,1              | 0.00048 | 0.0088  |
| GO:0048467                | gynoecium development                                                 | 7,0              | 2.7e-11 | 1.5e-09 |
| GO:0048863                | stem cell differentiation                                             | 7,0              | 2.1e-05 | 0.00059 |

**Supplemental Table 6:** GO term analysis of LIF2 or LHP1 depleted regions in the mutant backgrounds (AgriGO). Lists of GO terms with NF  $\geq$  7.

| Primer      | Sequence (5' to 3')                     | Application   |
|-------------|-----------------------------------------|---------------|
| 3HA-1       | ACACACACTGCAGGGGTTAATTAACATCTTTTACCC    | Cloning       |
| 3HA-2       | CGGAATCTAGAGTCGACGCTGCACTGAGCAGCGTAA    | Cloning       |
| 3HA-2       | CCGGATATCGTCGACGGGTTAATTAACATCTTTTACCC  | Cloning       |
| 3HA-2       | CGGGATATCTTACTCGAGGCACTGAGCAGCGTAATCTGG | Cloning       |
| Nost-1      | CCTAAGGTACCGAATTTCCCGATCGTTCA           | Cloning       |
| Nost-2      | CGGGAATTCGGATCTAGTAACATA                | Cloning       |
| AD379-28    | TACGCAGCTGTTGTAATCCAA                   | Cloning       |
| AD379-29    | CATTATCCTGCAGGTCTGACATCTGGTCATC         | Cloning       |
| AD379-30    | TTCCCCTCGAGATGTCAGACGCAAGAGATAA         | Cloning       |
| AD379-32    | TTGAAAGTTGAAACAAAATCAATCA               | Cloning       |
| JAZ1_F      | AGCTTCACTTCACCGTTCTTGGA                 | qRT-PCR       |
| JAZ1_R      | TCTTGTCTTGAAGCAACGTCGTC                 | qRT-PCR       |
| JAZ9_F      | TGCTGTCGAAGAACGAGGGT                    | qRT-PCR       |
| JAZ9_R      | CTTCCCCATTCTCTAGCTGC                    | qRT-PCR       |
| LOX3_F      | CGGATAGAGAAAGAGATTGAGAAAAGGAAC          | qRT-PCR       |
| LOX3_R      | GGTACACCTCTACACGTAACACCAGGC             | qRT-PCR       |
| MYC2_F      | GCCGAAGGAATACACGCAAT                    | qRT-PCR       |
| MYC2_R      | CGGGTTGTGAACGGGCTA                      | qRT-PCR       |
| VSP2_F      | TAGGCTTCAATATGAGATGCTTCCAGT             | qRT-PCR       |
| VSP2_R      | ACCGTTGGAATTTGTGGAAGAATG                | qRT-PCR       |
| JAZ6_A_F    | GTCTGCTCAGCCGGTACTTG                    | qChIP/qRT-PCR |
| JAZ6_A_R    | TTCGAGCCAACCCCATATTA                    | qChIP/qRT-PCR |
| CO_F        | AAC AAT GAC CGA TCC AGA GAA             | qChIP/qRT-PCR |
| CO_R        | CCT CCT TGG CAT CCT TAT CA              | qChIP/qRT-PCR |
| EF1_F       | CCA AGG GTG AAA GCA AGA AGA             | qChIP/qRT-PCR |
| EF1_R       | CTG GAG GTT TTG AGG CTG GTA T           | qChIP/qRT-PCR |
| MYC2_A_F    | CTCTTCCGATATCTCAACTTTATGG               | qChIP         |
| MYC2_A_R    | GGCGTCGGAGTTGTTTCA                      | qChIP         |
| miR156C_F   | TTGCGTGCTCACTGCTCTAT                    | qChIP         |
| miR156C_R   | AGAGAAAGTGAGAGATGGGAACA                 | qChIP         |
| AT1G21300-F | TGTACCAACAACGCTCCACT                    | qChIP         |
| AT1G21300_R | TTTCCAGATAGCGAAGTTGTCTT                 | qChIP         |
| AT1G47860_F | CCGCGTTTTGCACCATTAT                     | qChIP         |
| AT1G47860_R | CCATTGCCTACACGTACCG                     | qChIP         |
| DOG1_F      | TCTCGAGTGGATGAGTTTGC                    | qChIP         |
| DOG1_R      | TCTTCATCACCGTGAGAT CG                   | qChIP         |
| ERF4_F      | GTTTTCTTGCCCGGATCTC                     | qChIP         |
| ERF4_R      | CGTTAGGAAGCGTCCCTGG                     | qChIP         |
| NAC19_F     | TCTTCATCGGTGCGGTAAAATCGG                | qChIP         |
| NAC19_R     | TCCAAGAACTGACCCGTTAACGC                 | qChIP         |
| JAZ1_B_F    | GCAGAGAAGCAACAGCAACA                    | qChIP         |
| JAZ1_B_R    | TCTCGAATAGCTAAATCGATACAAAG              | qChIP         |
| JAZ9_A_F    | GTCGAGAATAATGGAACATATTAACC              | qChIP         |
| JAZ9_A_R    | GCAATAGGACGAACACAGTTATCA                | qChIP         |
| JAZ9_B_F    | TCTTCCTCTTCTTTAAATTGGATGTT              | qChIP         |
| JAZ9_B_R    | CAAACCTCAAATTAACGTGTTTCTC               | qChIP         |
| LOX3_A_F    | CATCACAGAAAGGTCATCACTTG                 | qChIP         |
| LOX3_A_R    | TTGATCGAGAAGTGTGTTGACTG                 | qChIP         |
| LOX3_C_F    | TTGGTACTCAGAATCAATCAACG                 | qChIP         |
| LOX3_C_R    | GGTCGTCGACGGTTGATAA                     | qChIP         |

Supplemental Table 7: List of primers.
